# Supplementary material
Source: PubMed Central journal article supplement (PMC2148312)

**A**

Monocyte derived immature DCs

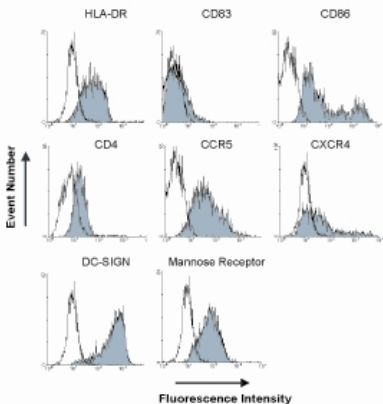**B**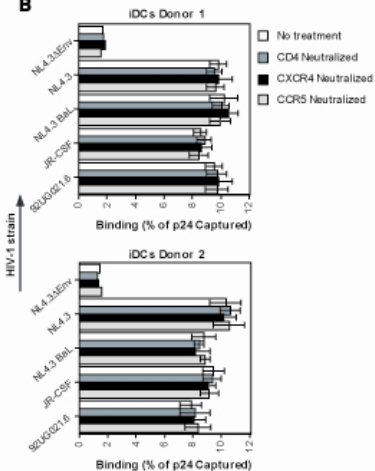

Supplement: pnas_0703747104_1.pdf [file pnas_0703747104_1.pdf]

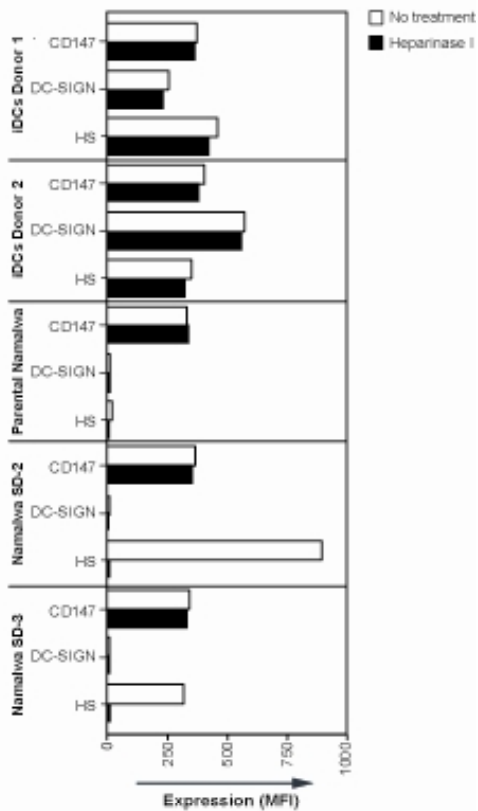

Supplement: pnas_0703747104_2.pdf [file pnas_0703747104_2.pdf]

**A**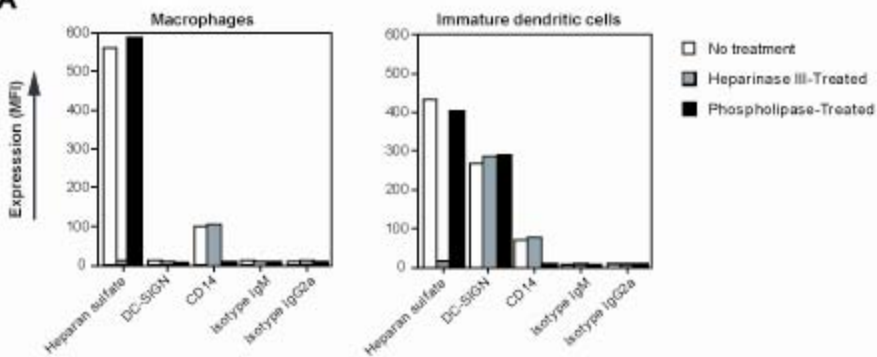**B**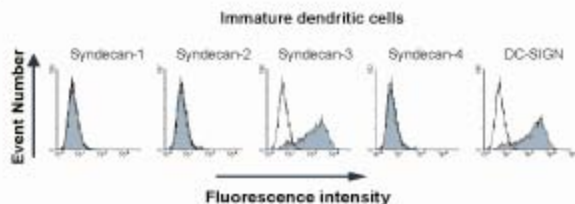**C**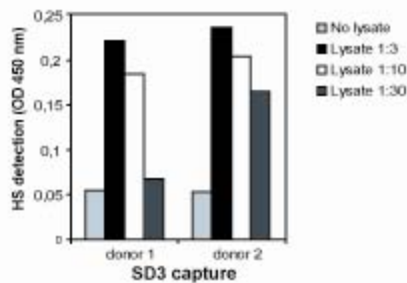

Supplement: pnas_0703747104_3.pdf [file pnas_0703747104_3.pdf]

**A**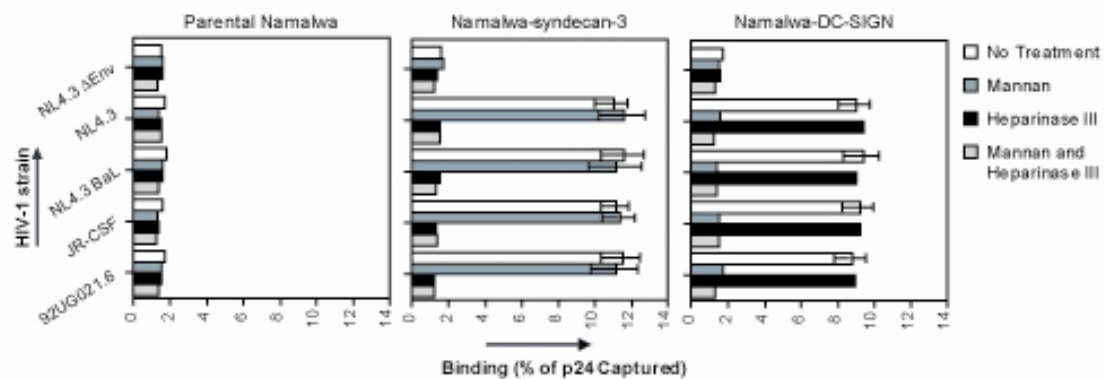**B**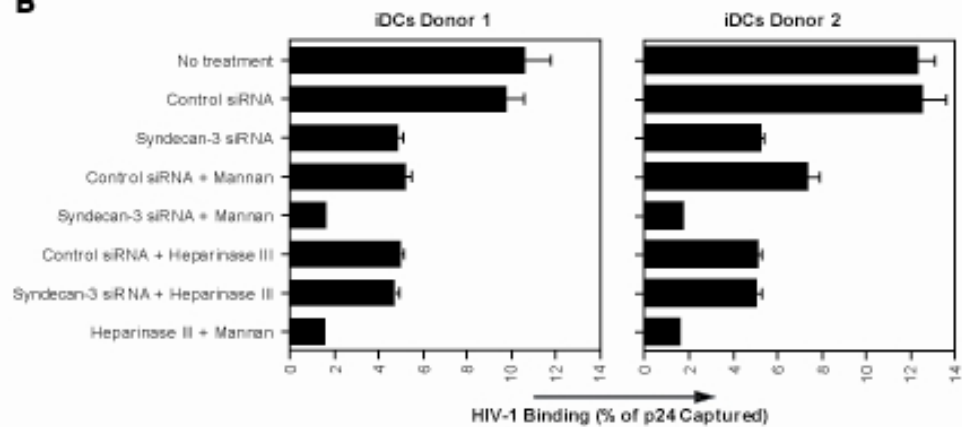

Supplement: pnas_0703747104_4.pdf [file pnas_0703747104_4.pdf]

Immature dendritic cells Donor 1-3  
Infection day 1

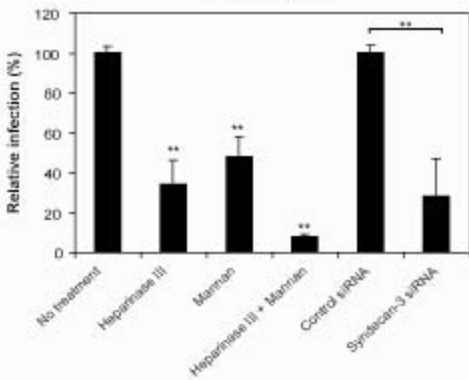

Supplement: pnas_0703747104_5.pdf [file pnas_0703747104_5.pdf]

Immature dendritic cells Donor 1-3  
HIV-1 infection day 9

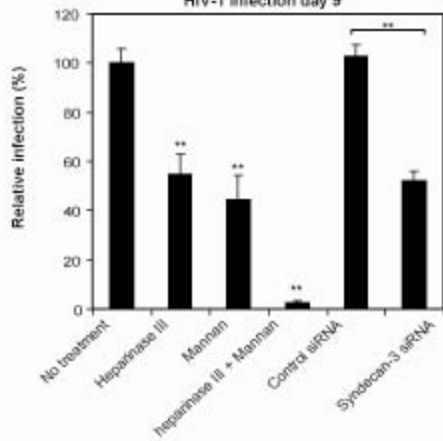

Supplement: pnas_0703747104_6.pdf [file pnas_0703747104_6.pdf]
